31 Keywords : O-GlcNAcylation; O-linked N-acetylglucosamine (O-GlcNAc)  
32 transferase (OGT); O-linked N-acetylglucosamine (O-GlcNAc); MYPT1 ; cell cycle ;  
33 mitosis ; protein phosphorylation ; CDK1 ; PLK1 ; centrosome  
34

35 **ABSTRACT**

36 The role of O-linked N-acetylglucosamine (O-GlcNAc) modification in the cell cycle  
37 has been enigmatic. Previously, both O-GlcNAc transferase (OGT) and O-GlcNAcase  
38 (OGA) disruption have been shown to derail the mitotic centrosome numbers,  
39 suggesting that mitotic O-GlcNAc oscillation needs to be in concert with mitotic  
40 progression to account for centrosome integrity. Here we attempted to address the  
41 underlying molecular mechanism by both chemical approaches and biological assays,  
42 and observed that Thiamet-G (OGA inhibitor) incubation strikingly elevated  
43 centrosomal distances, suggestive of premature centrosome disjunction. These  
44 aberrancies could be overcome by inhibiting Polo-like kinase 1 (Plk1), a mitotic  
45 master kinase. Plk1 inactivation is modulated by the Myosin Phosphatase Targeting  
46 Subunit 1 (MYPT1)-Protein Phosphatase 1 c $\beta$  (PP1c $\beta$ ) complex. Interestingly,  
47 MYPT1 is abundantly O-GlcNAcylated and the modified residues have been detected  
48 in a recent O-GlcNAc profiling screen utilizing chemoenzymatic labeling and  
49 bioorthogonal conjugation. We demonstrate that MYPT1 is O-GlcNAcylated at T577,  
50 S585, S589 and S601, which antagonizes CDK1-dependent phosphorylation at S473,  
51 subsequently attenuating the association between MYPT1 and Plk1, and promoting  
52 PLK1 activity. Thus under high O-GlcNAc, Plk1 is untimely activated, conducive to  
53 inopportune centrosome separation and disrupting the cell cycle. We propose that too  
54 much O-GlcNAc is equally deleterious as too little O-GlcNAc, and a fine balance  
55 between the OGT/OGA duo is indispensable for successful mitotic divisions.

## 56 INTRODUCTION

57 The centrosomes are the primary microtubule-organizing centers that nucleate  
58 the mitotic spindle apparatus to ensure subsequent faithful sister chromatid  
59 segregation during mitosis. The centrosome cycle is tightly coordinated with other  
60 cell cycle events <sup>1</sup>, and its aberrancy could culminate in chromosome segregation  
61 defects and aneuploidy <sup>2</sup>. The entire centrosome cycle encompasses centrosome  
62 duplication during S phase, disjunction in late G2 and further separation during  
63 prophase or prometaphase, and eventual segregation into the two daughter cells.

64 Centrosomes duplicate in concomitant with DNA replication, after which the  
65 sister centrosomes are glued together by two proteinaceous linkers, c-Nap1 and  
66 rootletin <sup>3,4</sup>, as well as other components such as Cep68, Cep215 and LRRC45 <sup>5</sup>.  
67 C-Nap1, a large coiled-coiled protein, links rootletin to the centrioles so that the  
68 centrosome pair is joined by fibrous polymers <sup>3</sup>. In late G2, the Never In Mitosis  
69 (NIMA)-related serine/threonine kinase Nek2A phosphorylates and displaces c-Nap1  
70 and rootletin, leading to disjoint centrosomes <sup>6</sup>. Centrosomal accumulation of Nek2A  
71 is mediated by the Hippo pathway, among which sterile 20-like kinase 2 (Mst2) and  
72 Salvador (Sav1) play critical roles. In particular, Mst2 phosphorylates and activates  
73 Nek2A <sup>7</sup>. Upstream of Mst2 is the mitotic master kinase, Polo-like kinase 1 (PLK1) <sup>8</sup>.

74 Following centrosome disjunction, the kinesin Eg5 accounts for centrosome  
75 positioning in the beginning of M phase. Cyclin-dependent kinase 1 (Cdk1)  
76 phosphorylates and activates Eg5 at T927 by stimulating the engagement between

77 Eg5 and microtubules<sup>9</sup>. Independently, centrosomal localization of Eg5 requires  
78 PLK1<sup>10</sup>, which activates the NIMA-family kinase Nek9, leading to Eg5  
79 phosphorylation at S1033 by the Nek9/6/7 complex<sup>11</sup>. Phosphorylated Eg5 then binds  
80 centrosomal Targeting Protein for Xenopus kinesin-like protein 2 (TPX2), which is  
81 also mediated by Nek9<sup>12</sup>. Besides mitosis, Eg5 also governs centrosome dynamics  
82 during interphase<sup>10</sup>. Hence, the centrosomal role of Plk1 is two-fold : centrosome  
83 disjunction via the PLK1-Mst2-Nek2A signaling cascade, and centrosome separation  
84 through PLK1- Nek9/6/7- Eg5<sup>13</sup>.

85 Besides centrosomes, PLK1 also orchestrates a multitude of cell cycle events,  
86 including replication, mitotic entry, chromosome segregation and cytokinesis<sup>4,14-16</sup>. It  
87 contains an N-terminal kinase domain and a C-terminal polo-box binding domain  
88 (PBD). Phosphorylation of PLK1 at T210 at the T-loop is mediated by the Aurora  
89 A-Bora complex<sup>17</sup>, resulting in dissociation of PBD from the kinase domain and thus  
90 activating PLK1. Dephosphorylation of PLK1 is modulated by the protein  
91 phosphatase 1 c $\beta$  (PP1c $\beta$ ), targeted by the myosin phosphatase targeting subunit 1  
92 (MYPT1)<sup>18</sup>. Specifically, CDK1 phosphorylates MYPT1 at Ser473, creating a  
93 binding pocket between MYPT1 and the PBD of PLK1. Subsequently MYPT1  
94 recruits PP1c $\beta$  to dephosphorylate pT210 of PLK1<sup>18</sup>. Such interaction at the  
95 kinetochore destabilizes kinetochore-microtubule attachments<sup>19</sup>. Besides  
96 phosphorylation, PLK1 is also methylated at K209<sup>20,21</sup>, which vies with pT210 and  
97 hence blocking Plk1 activity.

98           Due to the vital role of PLK1 in mitosis, MYPT1 is subject to multifaceted  
99   regulations: the Hippo pathway kinase LATS1/WARTS phosphorylates MYPT1 at  
100   S445 to inactivate PLK1<sup>22</sup>; optineurin, another phosphatase, promotes MYPT1  
101   activity<sup>23</sup>; checkpoint kinase 1 (CHK1) phosphorylates MYPT1 at S20, and  
102   enhances MYPT1-PP1c $\beta$  binding<sup>24</sup>; checkpoint kinase 2 (CHK2) phosphorylates  
103   MYPT1 at S507 to attenuate pS473<sup>25</sup>.

104           Previous investigations have identified that MYPT1 is also subject to O-linked  
105   N-acetylglucosamine (O-GlcNAc) modifications<sup>26</sup>. O-GlcNAcylation is an emerging  
106   post-translational modification (PTM) that integrates the metabolic signals with  
107   transcription, nutrient sensing, stress responses and cell cycle events<sup>27,28</sup>. It is  
108   catalyzed by the sole transferase O-GlcNAc transferase (OGT), and reversed by the  
109   only O-GlcNAcase (OGA)<sup>27</sup>. Chemical inhibitors of OGT [acetyl-5S-GlcNAc (5S-G)]  
110   and OGA [Thiamet-G (TMG)] have been developed to interrogate various biological  
111   processes<sup>29</sup>. During the cell cycle, O-GlcNAcylation levels fluctuate as the cells  
112   proceed through different stages<sup>30</sup>. In particular, both OGT and OGA overproduction  
113   results in multipolar spindles<sup>31</sup>. However, myriad targets of O-GlcNAc and its  
114   quintessential functions remain largely unexplored. Here we identify the O-GlcNAc  
115   modified residues of MYPT1. We show that O-GlcNAcylation of MYPT1  
116   antagonizes pS473, and results in its dissociation from PLK1. Elevated O-GlcNAc  
117   levels thus fuel PLK1 activity towards centrosomes and render ill-timed centrosome  
118   separation, disrupting the mitotic cell cycle.

119 **RESULTS**

120 **O-GlcNAc promotes aberrant centrosome separation via PLK1**

121 Previously, both OGT and OGA overproduction has been linked with multi-polar  
122 spindle<sup>31</sup>. We sought to identify whether O-GlcNAc could also be linked with  
123 centrosome dynamics. Strikingly, when HeLa cells were treated with TMG (OGAi),  
124 the inter-centrosomal distance was significantly augmented four-fold (Fig. 1A),  
125 reminiscent of the phenotype of Nek2A overexpression or over-activation<sup>4,32</sup>. As the  
126 centrosome cycle is tightly governed by PLK1, we attempted to inhibit PLK1. When  
127 BI2536 (PLK1i) was adopted in conjuncture with TMG, the centrosomal distances  
128 shortened considerably (Fig. 1A-C). When BI2536 was utilized alone (Fig. 1A), the  
129 cells reduced centrosomal distances as previously reported<sup>4</sup>. These cytological  
130 studies suggest that high O-GlcNAc culminates in premature centrosomal separation,  
131 probably via PLK1.

132

133 **MYPT1 is O-GlcNAcylated at T577, S585, S589 and S601.**

134 Previous investigation has identified the inactivating phosphatase of PLK1 is  
135 PP1c $\beta$ , which is targeted by MYPT1<sup>18</sup>. Intriguingly, MYPT1 is O-GlcNAcylated<sup>26</sup>.  
136 Therefore we reasoned that O-GlcNAc might exert its effect through MYPT1.

137 First, we validated the interaction between MYPT1 and OGT through  
138 biochemical assays. As shown in Fig. 2A, GST-OGT pulled-down HA-MYPT1 from  
139 cell extracts. Then both OGT and MYPT1 proteins were purified from *E. coli*. Upon

140 incubation, His-OGT pulled-down GST-MYPT1 (Fig. 2B), suggesting that the  
141 interact is direct.

142 Then we mapped which domain of MYPT1 interacts with OGT. As MYPT1 is a  
143 relative large protein, we constructed several fragments of MYPT1 as previously  
144 described: F1 (1-306), F2 (297-600), F3 (586-901) and F4 (886-1030) (Fig. 2C)<sup>24</sup>. To  
145 investigate which fragment interacts with OGT, recombinant full-length (FL) and  
146 F1-F4 MYPT1 proteins were utilized in pulldown experiments, and the FL, F2 and F3  
147 MYPT1 pulled-down Myc-OGT (Fig. 2D), suggesting that the potential modification  
148 sites could be residing in F2 and F3.

149 A recent quantitative proteomic analysis of protein O-GlcNAc sites using an  
150 isotope-tagged cleavable linker (isoTCL) strategy identified the potential O-GlcNAc  
151 sites of MYPT1 to be T577, S585, S589 and S601<sup>33</sup> (Fig. 3 A-D), all of which locate  
152 on F2 and F3. We constructed the T577A/S585A/S589A/S601A (4A) mutant  
153 accordingly and assessed its effect. When HA-MYPT1-wild type (WT) and 4A  
154 plasmids were transfected into cells, the 4A mutant significantly abrogated  
155 O-GlcNAcylation (Fig. 4A), suggesting that these four amino acids are major  
156 O-GlcNAc sites. Considering that MYPT1 is abundantly O-GlcNAcylated, and other  
157 proteomic screens have also identified extra glycosylation sites<sup>34</sup>, our results do not  
158 exclude the possibility that there could be more O-GlcNAcylated residues on MYPT1.  
159



160 **O-GlcNAcylation of MYPT1 antagonizes CDK1-dependent phosphorylation at**  
161 **S473**

162 Since CDK1 phosphorylates MYPT1 at S473 during mitosis and creates a  
163 binding motif between MYPT1 and the PBD of PLK1<sup>18</sup>, we surmised that O-GlcNAc  
164 of MYPT1 might interplay with pS473. To address this possibility, we used a  
165 phospho-specific antibody targeting pS473 that has been previously described and  
166 utilized<sup>25</sup>.

167 Then the WT and 4A plasmids are compared for the pS473 levels, and it is  
168 significantly bolstered in the 4A mutant (Fig. 4B). When Noc was used to  
169 synchronize cells in the M phase, O-GlcNAc levels decreased while pS473 levels  
170 arose (Fig. 4C). As pS473 is mediated by CDK1, we adopted RO-3306 again, and  
171 observed that RL2 levels decreased while pS473 levels increased in the  
172 RO-3306-treated cells (Fig.4C). This is consistent with our conjecture that O-GlcNAc  
173 antagonizes pS473. Lastly, we utilized the 5S-G inhibitor for OGT<sup>29</sup>, and 5S-G  
174 treatment substantially boosted pS473 levels of transfected HA-MYPT1(Fig. 4D). We  
175 also examined the effects of 5S-G on endogenous MYPT1. Noc treatment enhanced  
176 pS473 levels, and Noc plus 5S-G elevated pS473 markedly (Fig. 4E). In contrast,  
177 glucose plus TMG (TMG+Glu) treatment during Noc would down-regulate pS473  
178 compared to Noc alone (Fig. 4F). Taken together, O-GlcNAc of MYPT1 attenuates  
179 pS473.

180

181 **O-GlcNAcylation inhibits MYPT1-PLK1 association**

182 Since pS473 promotes MYPT1-PLK1 association<sup>18</sup>, we then explored the effect  
183 of O-GlcNAc on the interaction between MYPT1 and PLK1 by treating the cells with  
184 TMG+Glu to enhance O-GlcNAc<sup>35,36</sup>. As shown in Fig. 5A, Noc increased  
185 PLK1-MYPT1 association discernably as reported<sup>18</sup>, but TMG+Glu together with  
186 Noc obliterated PLK1-MYPT1 affinity.

187 As phosphorylated MYPT1 binds with PLK1-PBD<sup>18</sup>, we adopted GST  
188 pulldown experiments using PLK1-PBD, and GST-PLK1-PBD modestly increased  
189 binding with HA-MYPT1-4A (Fig. 5B). Then we employed FL-PLK1. When we  
190 directly utilized the 4A mutant to coIP PLK1, the interaction between MYPT1 and  
191 PLK1 substantially upregulated (Fig. 5C). When His-PLK1 was applied in pulldown  
192 assays, 4A again manifested more robust association with PLK1 (Fig. 5D). In sum, the  
193 binding between PLK1 and MYPT1 was abolished during high O-GlcNAc.

194

195 **O-GlcNAcylation of MYPT1 enhances PLK1 activity**

196 As the MYPT1 associates PLK1 to target PP1c $\beta$  to dephosphorylate and  
197 deactivate PLK1<sup>18</sup>, stronger affinity could signify less activity. We took advantage of  
198 the IP-phosphatase assay to examine PLK1 activity<sup>22,24</sup>. Cells were transfected with  
199 Flag-MYPT1 and treated with Noc. Cells were also supplemented with TMG + Glu to  
200 enrich for O-GlcNAc or not treated. When the anti-FLAG immunoprecipitates were  
201 incubated with recombinant PLK1, the relative low O-GlcNAc group efficiently

202 dephosphorylated PLK1, as detected by IB with PLK1-pT210 antibodies, but not the  
203 high O-GlcNAc group (Fig. 6A).

204 MYPT1-4A mutants were then directly exploited in the IP-phosphate assay. In  
205 the absence of Noc, MYPT1-WT decreased PLK1 pT210 levels, and the MYPT1-4A  
206 completely abolished PLK1-pT210 levels (Fig. 6B). This is consistent with our results  
207 in Fig. 5C-D that MYPT1-4A partners with PLK1 in the absence of Noc treatment.  
208 Collectively, our biochemical assays suggest that O-GlcNAcylated MYPT1 disjoins  
209 PLK1 and promotes its kinase activity.

210

#### 211 **MYPT1-4A Suppresses the TMG-induced centrosome disjunction defects**

212 Since the aforementioned results suggest that MYPT1 O-GlcNAcylation is a  
213 pivotal regulator in centrosome separation, we undertook sh*MYPT1* to knockdown  
214 endogenous MYPT1 (Fig. 7A), so that the effects of MYPT1-4A could be directly  
215 measured and observed after TMG incubation. As shown in Fig. 7B, the premature  
216 centrosome separation phenotype is discernable in the sh*MYPT1* cells that bears  
217 MYPT1-WT plasmids. But in the cells transfected with MYPT1-4A plasmids, the  
218 aberrancy is suppressed (Fig. 7C), in line with previous reports that PLK1  
219 sequestration culminates in duplicated but unseparated centrosomes<sup>37,38</sup>. Taken  
220 together, the 4A mutant fails to show the untimely centrosome separation phenotype,  
221 probably due to PLK1 suppression.

222

223

224 **DISCUSSION**

225 In this study, we identify that O-GlcNAc regulates centrosome separation  
226 through the MYPT1-PLK1 complex. We pinpoint the major O-GlcNAcylated sites of  
227 MYPT1 to be S564, S566, T570 and S578 in human cells, and further delineate that  
228 O-GlcNAc antagonizes pS473, hinders MYPT1-PLK1 association, thus boosting  
229 PLK1 activity and hence centrosome disjunction (Fig. 7D). When MYPT1 fails to be  
230 O-GlcNAcylated, as in the MYPT1-4A mutant, PLK1 activity is dampened (Fig. 6B).

231 MYPT1 is one of the most abundant O-GlcNAcylated proteins, and its  
232 modification sites have been unveiled time and again in distinct proteomic studies  
233 <sup>34,39,40</sup>. Perhaps O-GlcNAc sites might not be conserved between humans and mice.  
234 MYPT1 is found to be O-GlcNAcylated at S564, S566, T570 and S578 by mass  
235 spectrometry in the mouse brain <sup>40</sup>, but our data show in HeLa cells O-GlcNAc occurs  
236 in T577, S585, S589 and S601. Previously, p53 is identified to be O-GlcNAcylated at  
237 S149 <sup>41</sup>, which is not conserved in mice either. The same also holds true for  
238 phosphorylation. For instance, Ataxia-telangiectasia mutated (ATM), a vital sensor  
239 protein for DNA damage signaling, is phosphorylated at S1981 and then activated in  
240 humans, but mutation of S1987 (the mouse equivalent) does not hinder ATM function  
241 in mice <sup>42,43</sup>. Thus extrapolating data across species needs extra caution, as the  
242 function and sites of PTMs could be context-dependent.

243 Along the same vein, there could be more O-GlcNAc sites on MYPT1, as the  
244 proteomic studies were carried out under disparate circumstances and using different

245 click chemistry methodologies<sup>33,34,39,40</sup>. As the O-GlcNAc modification is highly  
246 dynamic, distinct sites could be modified in response to environmental cues.  
247 O-GlcNAc could have multi-faceted effects on the centrosome. Both OGT and  
248 OGA overexpression result in multi-polar spindles, which could be repressed by TMG  
249 treatment<sup>31</sup>. NuMA (nuclear mitotic apparatus protein) is indispensable for spindle  
250 pole formation and regulates spindle pole cohesion<sup>44,45</sup>. NuMA is O-GlcNAcylated  
251 and its localization was led astray by OGT overexpression<sup>46</sup>. Further investigations  
252 reveal that O-GlcNAcylated NuMA interacts with Galectin-3, which is a prerequisite  
253 for mitotic spindle cohesion and proper NuMA localization<sup>47</sup>. Here we reveal that  
254 centrosome dynamics is also governed by O-GlcNAcylation levels. As the  
255 centrosome is pivotal for the mitotic process, O-GlcNAc is bound to modulate other  
256 aspects of centrosome function.

257 Our results indicate that O-GlcNAcylated MYPT1 attenuates interaction with  
258 PLK1 and thus promotes PLK1 activity. It is intriguing that overall PLK1 pT210  
259 levels remain unaltered in OGT or OGA overproduction cells<sup>31,46</sup>. We did not detect  
260 discernable difference either, in cells supplemented with TMG plus Glucose (data not  
261 shown). This may seem paradoxical at first, but considering the versatile roles of  
262 PLK1 during mitosis<sup>4,14-16</sup>, we could entertain the possibility that only a small pool of  
263 PLK1 is regulated by MYPT1. First, although the overall activity of PLK1 is  
264 upregulated during mitosis, CDK1 actually dampens PLK1 activity via MYPT1 in a  
265 mitosis-specific fashion<sup>18</sup>. Secondly, the pool of PLK1 responsible for

266 kinetochore-microtubule attachment actually contains low PLK1 kinase activity  
267 during metaphase so that microtubules could be dynamic<sup>48</sup>. Therefore, irrespective of  
268 the overall elevation of mitotic activity, the mitotic master kinase - PLK1 is perhaps  
269 indeed fine-tuned in space and time. And O-GlcNAc, could be the sweet icing on the  
270 cake.

271

## 272 **EXPERIMENTAL PROCEDURES**

### 273 *Cell culture, antibodies and plasmids*

274 Cells were purchased from ATCC. Antibodies were as follows: anti-MYPT1  
275 (Bethyl, # BL3866), anti-PLK1 (Zymed, #37-7100), PLK1-pT210 (BD Pharmingen,  
276 #558400). Antibodies against pS473 were prepared as described before<sup>25</sup> and  
277 manufactured by Beijing B&M Biotech Co., Ltd.. *MYPT1* plasmids were described  
278 before<sup>49</sup>. *MYPT1-4A* plasmids were generated using specific primers (sequences  
279 available upon request) following the manufacturer's instructions (QuickChange II,  
280 Stratagene). His-OGT was from Dr. Yue Wang (Peking Univ.). The following  
281 shRNA target sequences were used: sh*MYPT1*: GTAACCCAGTGGACCATAATT.

282

### 283 *Immunoprecipitation (IP) and Immunoblotting (IB) assays*

284 IP and IB experiments were performed as described before<sup>50</sup>. The following  
285 primary antibodies were used for IB: anti- $\beta$ -actin (1:10000), anti-HA (1:1000), and  
286 anti-FLAG M2 (Sigma) (1:1000), anti-Myc (1:1000), anti-PLK1 (1:1000),

287 anti-MYPT1 (1:1000), PLK1-pT210 (1:500). The IP-phosphatase assay was  
288 performed as before<sup>22,24</sup>.

289 Peroxidase-conjugated secondary antibodies were from JacksonImmuno  
290 Research. Blotted proteins were visualized using the ECL detection system  
291 (Amersham). Signals were detected by a LAS-4000, and quantitatively analyzed by  
292 densitometry using the Multi Gauge software (Fujifilm). All western blots were  
293 repeated for at least three times.

294

#### 295 *Cell Culture Treatment*

296 Chemical utilization: Nocodazole (Noc) at 100 ng/ml for 16 hours; Ro 3306  
297 (CDK1 inhibitor) at 2  $\mu$ M for the time indicated; BI2536 (PLK1 inhibitor) at 100 nM  
298 for two hours; Thiamet-G (TMG) (OGA inhibitor) at 5 $\mu$ M for 24 hrs ;  
299 acetyl-5S-GlcNAc (5S-G) (OGT inhibitor) was used at 100 $\mu$ M (prepared at 50 mM in  
300 DMSO) for 24 hrs [64].

301

#### 302 *Indirect Immunofluorescence*

303 Indirect immunofluorescence staining was performed as described before<sup>50</sup>.

304 Dilutions of primary antibodies were 1:1,000 for mouse anti- $\gamma$ -tubulin. Cell nuclei  
305 were stained with DAPI. Quantitation was performed with the software Image J.

306

#### 307 **Abbreviations:**

308 PTM, post-translational modification; O-GlcNAc, O-linked N-acetylglucosamine;  
309 OGT, O-GlcNAc transferase; TMG, Thiamet-G; PBD, polo-box binding domain ;  
310 MYPT1, myosin phosphatase targeting subunit 1; Cdk1, Cyclin-dependent kinase 1 ;  
311 PLK1, Polo-like kinase 1 ; 5S-G, acetyl-5S-GlcNAc; PP1c $\beta$ , protein phosphatase 1 c  
312  $\beta$  ; FL, full-length ; ETD, Electron Transfer Dissociation

313

### 314 **Acknowledgements**

315 We thank Dr. Hai-Ning Du (Wuhan Univ.) and the Li laboratory for helpful  
316 discussion. This work is supported by the National Natural Science Foundation of  
317 China (NSFC) fund (31872720) and Capacity Building for Sci-Tech Innovation -  
318 Fundamental Scientific Research Funds (19530050137) to J. L.; NSFC (NOs.  
319 21425204, 21672013 and 21521003) and the National Key Research and  
320 Development Projects (NOs. 2016YFA0501500 and 2018YFA0507600) to X.C.;  
321 NSFC (91853120) and the National Major Scientific and Technological Special  
322 Project of China for "Significant New Drugs Development" (2018ZX09711001-013)  
323 to Z. T.

324

### 325 **Competing interests**

326 The authors declare that they have no conflicts of interest with the contents of this  
327 article.

328



329 **Author contributions**

330 J. L., X.C. and Z.T. conceived the project and analyzed the data. C. L., Y. S., X. L., Z.

331 X. and Jie L. performed all the experiments. All authors reviewed and approved the

332 manuscript.

333

334 **References**

- 335 1 Vertii, A., Hehnlly, H. & Doxsey, S. The Centrosome, a Multitalented  
336 Renaissance Organelle. *Cold Spring Harb Perspect Biol* **8**,  
337 doi:10.1101/cshperspect.a025049 (2016).
- 338 2 Silkworth, W. T., Nardi, I. K., Paul, R., Mogilner, A. & Cimini, D. Timing of  
339 centrosome separation is important for accurate chromosome segregation. *Mol*  
340 *Biol Cell* **23**, 401-411, doi:10.1091/mbc.E11-02-0095 (2012).
- 341 3 Bahe, S., Stierhof, Y. D., Wilkinson, C. J., Leiss, F. & Nigg, E. A. Rootletin  
342 forms centriole-associated filaments and functions in centrosome cohesion. *J*  
343 *Cell Biol* **171**, 27-33, doi:10.1083/jcb.200504107 (2005).
- 344 4 Mardin, B. R., Agircan, F. G., Lange, C. & Schiebel, E. Plk1 controls the  
345 Nek2A-PP1gamma antagonism in centrosome disjunction. *Curr Biol* **21**,  
346 1145-1151, doi:10.1016/j.cub.2011.05.047 (2011).
- 347 5 van Ree, J. H., Nam, H. J. & van Deursen, J. M. Mitotic kinase cascades  
348 orchestrating timely disjunction and movement of centrosomes maintain  
349 chromosomal stability and prevent cancer. *Chromosome Res* **24**, 67-76,  
350 doi:10.1007/s10577-015-9501-9 (2016).
- 351 6 Hardy, T. *et al.* Multisite phosphorylation of C-Nap1 releases it from Cep135  
352 to trigger centrosome disjunction. *J Cell Sci* **127**, 2493-2506,  
353 doi:10.1242/jcs.142331 (2014).
- 354 7 Mardin, B. R. *et al.* Components of the Hippo pathway cooperate with Nek2  
355 kinase to regulate centrosome disjunction. *Nat Cell Biol* **12**, 1166-1176,  
356 doi:10.1038/ncb2120 (2010).
- 357 8 Barr, F. A., Sillje, H. H. & Nigg, E. A. Polo-like kinases and the orchestration  
358 of cell division. *Nat. Rev. Mol. Cell. Biol.* **5**, 429-440, doi:10.1038/nrm1401  
359 (2004).
- 360 9 Blangy, A. *et al.* Phosphorylation by p34cdc2 regulates spindle association of  
361 human Eg5, a kinesin-related motor essential for bipolar spindle formation in  
362 vivo. *Cell* **83**, 1159-1169 (1995).
- 363 10 Smith, E. *et al.* Differential control of Eg5-dependent centrosome separation  
364 by Plk1 and Cdk1. *EMBO J* **30**, 2233-2245, doi:10.1038/emboj.2011.120  
365 (2011).
- 366 11 Bertran, M. T. *et al.* Nek9 is a Plk1-activated kinase that controls early  
367 centrosome separation through Nek6/7 and Eg5. *EMBO J* **30**, 2634-2647,  
368 doi:10.1038/emboj.2011.179 (2011).
- 369 12 Eibes, S. *et al.* Nek9 Phosphorylation Defines a New Role for TPX2 in  
370 Eg5-Dependent Centrosome Separation before Nuclear Envelope Breakdown.  
371 *Curr Biol* **28**, 121-129 e124, doi:10.1016/j.cub.2017.11.046 (2018).
- 372 13 Wang, G., Jiang, Q. & Zhang, C. The role of mitotic kinases in coupling the  
373 centrosome cycle with the assembly of the mitotic spindle. *J Cell Sci* **127**,  
374 4111-4122, doi:10.1242/jcs.151753 (2014).

- 375 14 Zitouni, S., Nabais, C., Jana, S. C., Guerrero, A. & Bettencourt-Dias, M.  
376 Polo-like kinases: structural variations lead to multiple functions. *Nat Rev Mol*  
377 *Cell Biol* **15**, 433-452, doi:10.1038/nrm3819 (2014).
- 378 15 Song, B., Liu, X. S. & Liu, X. Polo-like kinase 1 (Plk1): an Unexpected Player  
379 in DNA Replication. *Cell division* **7**, 3, doi:10.1186/1747-1028-7-3 (2012).
- 380 16 Li, J., Wang, J., Jiao, H., Liao, J. & Xu, X. Cytokinesis and cancer: Polo loves  
381 ROCK'n' Rho(A). *J. Genet. Genomics*. **37**, 159-172,  
382 doi:10.1016/S1673-8527(09)60034-5 (2010).
- 383 17 Seki, A., Coppinger, J. A., Jang, C. Y., Yates, J. R. & Fang, G. Bora and the  
384 kinase Aurora A cooperatively activate the kinase Plk1 and control mitotic  
385 entry. *Science* **320**, 1655-1658, doi:10.1126/science.1157425 (2008).
- 386 18 Yamashiro, S. *et al.* Myosin phosphatase-targeting subunit 1 regulates mitosis  
387 by antagonizing polo-like kinase 1. *Dev. Cell* **14**, 787-797,  
388 doi:10.1016/j.devcel.2008.02.013 (2008).
- 389 19 Dumitru, A. M. G., Rusin, S. F., Clark, A. E. M., Kettenbach, A. N. &  
390 Compton, D. A. Cyclin A/Cdk1 modulates Plk1 activity in prometaphase to  
391 regulate kinetochore-microtubule attachment stability. *Elife* **6**,  
392 doi:10.7554/eLife.29303 (2017).
- 393 20 Feldman, M., Vershinin, Z., Goliand, I., Elia, N. & Levy, D. The  
394 methyltransferase SETD6 regulates Mitotic progression through PLK1  
395 methylation. *Proc Natl Acad Sci U S A* **116**, 1235-1240,  
396 doi:10.1073/pnas.1804407116 (2019).
- 397 21 Li, W. *et al.* A methylation-phosphorylation switch determines Plk1 kinase  
398 activity and function in DNA damage repair. *Sci Adv* **5**, eaau7566,  
399 doi:10.1126/sciadv.aau7566 (2019).
- 400 22 Chiyoda, T. *et al.* LATS1/WARTS phosphorylates MYPT1 to counteract  
401 PLK1 and regulate mammalian mitotic progression. *J Cell Biol* **197**, 625-641,  
402 doi:10.1083/jcb.201110110 (2012).
- 403 23 Kachaner, D. *et al.* Plk1-dependent phosphorylation of optineurin provides a  
404 negative feedback mechanism for mitotic progression. *Mol Cell* **45**, 553-566,  
405 doi:10.1016/j.molcel.2011.12.030 (2012).
- 406 24 Hu, X. *et al.* Chk1 modulates the interaction between myosin phosphatase  
407 targeting protein 1 (MYPT1) and protein phosphatase 1c beta (PP1c beta). *Cell*  
408 *Cycle* **17**, 421-427, doi:10.1080/15384101.2017.1418235 (2018).
- 409 25 Nai, S. *et al.* Chk2-dependent phosphorylation of myosin phosphatase  
410 targeting subunit 1 (MYPT1) regulates centrosome maturation. *Cell Cycle*, 1-9,  
411 doi:10.1080/15384101.2019.1654795 (2019).
- 412 26 Cheung, W. D., Sakabe, K., Housley, M. P., Dias, W. B. & Hart, G. W.  
413 O-linked beta-N-acetylglucosaminyltransferase substrate specificity is  
414 regulated by myosin phosphatase targeting and other interacting proteins. *J*  
415 *Biol Chem* **283**, 33935-33941, doi:10.1074/jbc.M806199200 (2008).
- 416 27 Hart, G. W., Slawson, C., Ramirez-Correa, G. & Lagerlof, O. Cross talk

- 417 between O-GlcNAcylation and phosphorylation: roles in signaling,  
418 transcription, and chronic disease. *Annu Rev Biochem* **80**, 825-858,  
419 doi:10.1146/annurev-biochem-060608-102511 (2011).
- 420 28 Yang, X. & Qian, K. Protein O-GlcNAcylation: emerging mechanisms and  
421 functions. *Nat Rev Mol Cell Biol* **18**, 452-465, doi:10.1038/nrm.2017.22  
422 (2017).
- 423 29 Gloster, T. M. *et al.* Hijacking a biosynthetic pathway yields a  
424 glycosyltransferase inhibitor within cells. *Nat Chem Biol* **7**, 174-181,  
425 doi:10.1038/nchembio.520 (2011).
- 426 30 Liu, C. & Li, J. O-GlcNAc: A Sweetheart of the Cell Cycle and DNA Damage  
427 Response. *Front Endocrinol (Lausanne)* **9**, 415,  
428 doi:10.3389/fendo.2018.00415 (2018).
- 429 31 Tan, E. P., Caro, S., Potnis, A., Lanza, C. & Slawson, C. O-linked  
430 N-acetylglucosamine cycling regulates mitotic spindle organization. *J Biol*  
431 *Chem* **288**, 27085-27099, doi:10.1074/jbc.M113.470187 (2013).
- 432 32 Chen, C. H. *et al.* Characterization of Cep85 - a new antagonist of Nek2A that  
433 is involved in the regulation of centrosome disjunction (vol 128, pg 3290,  
434 2015). *Journal of Cell Science* **128**, 3837-3837, doi:10.1242/jcs.180463  
435 (2015).
- 436 33 Qin, K. *et al.* Quantitative Profiling of Protein O-GlcNAcylation Sites by an  
437 Isotope-Tagged Cleavable Linker. *ACS Chem Biol*,  
438 doi:10.1021/acscchembio.8b00414 (2018).
- 439 34 Woo, C. M. *et al.* Mapping and Quantification of Over 2000 O-linked  
440 Glycopeptides in Activated Human T Cells with Isotope-Targeted  
441 Glycoproteomics (Isotag). *Mol Cell Proteomics* **17**, 764-775,  
442 doi:10.1074/mcp.RA117.000261 (2018).
- 443 35 Ramakrishnan, P. *et al.* Activation of the transcriptional function of the  
444 NF-kappaB protein c-Rel by O-GlcNAc glycosylation. *Sci Signal* **6**, ra75,  
445 doi:10.1126/scisignal.2004097 (2013).
- 446 36 Tian, J. *et al.* O-GlcNAcylation Antagonizes Phosphorylation of CDH1  
447 (CDC20 Homologue 1). *J Biol Chem* **291**, 12136-12144,  
448 doi:10.1074/jbc.M116.717850 (2016).
- 449 37 Lane, H. A. & Nigg, E. A. Antibody microinjection reveals an essential role  
450 for human polo-like kinase 1 (Plk1) in the functional maturation of mitotic  
451 centrosomes. *J Cell Biol* **135**, 1701-1713, doi:10.1083/jcb.135.6.1701 (1996).
- 452 38 Sumara, I. *et al.* Roles of polo-like kinase 1 in the assembly of functional  
453 mitotic spindles. *Curr Biol* **14**, 1712-1722, doi:10.1016/j.cub.2004.09.049  
454 (2004).
- 455 39 Li, J. *et al.* An Isotope-Coded Photocleavable Probe for Quantitative Profiling  
456 of Protein O-GlcNAcylation. *ACS Chem Biol*,  
457 doi:10.1021/acscchembio.8b01052 (2019).
- 458 40 Alfaro, J. F. *et al.* Tandem mass spectrometry identifies many mouse brain

- 459 O-GlcNAcylated proteins including EGF domain-specific O-GlcNAc  
460 transferase targets. *Proc Natl Acad Sci U S A* **109**, 7280-7285,  
461 doi:10.1073/pnas.1200425109 (2012).
- 462 41 Yang, W. H. *et al.* Modification of p53 with O-linked N-acetylglucosamine  
463 regulates p53 activity and stability. *Nat Cell Biol* **8**, 1074-1083,  
464 doi:10.1038/ncb1470 (2006).
- 465 42 Pellegrini, M. *et al.* Autophosphorylation at serine 1987 is dispensable for  
466 murine Atm activation in vivo. *Nature* **443**, 222-225, doi:10.1038/nature05112  
467 (2006).
- 468 43 Shiloh, Y. & Ziv, Y. The ATM protein kinase: regulating the cellular response  
469 to genotoxic stress, and more. *Nat Rev Mol Cell Biol* **14**, 197-210 (2013).
- 470 44 Silk, A. D., Holland, A. J. & Cleveland, D. W. Requirements for NuMA in  
471 maintenance and establishment of mammalian spindle poles. *J Cell Biol* **184**,  
472 677-690, doi:10.1083/jcb.200810091 (2009).
- 473 45 Kong, X. *et al.* Cohesin associates with spindle poles in a mitosis-specific  
474 manner and functions in spindle assembly in vertebrate cells. *Mol Biol Cell* **20**,  
475 1289-1301, doi:10.1091/mbc.E08-04-0419 (2009).
- 476 46 Wang, Z. *et al.* Extensive crosstalk between O-GlcNAcylation and  
477 phosphorylation regulates cytokinesis. *Sci Signal* **3**, ra2,  
478 doi:10.1126/scisignal.2000526 (2010).
- 479 47 Magescas, J. *et al.* Spindle pole cohesion requires glycosylation-mediated  
480 localization of NuMA. *Sci Rep* **7**, 1474, doi:10.1038/s41598-017-01614-6  
481 (2017).
- 482 48 Liu, D., Davydenko, O. & Lampson, M. A. Polo-like kinase-1 regulates  
483 kinetochore-microtubule dynamics and spindle checkpoint silencing. *J Cell*  
484 *Biol* **198**, 491-499, doi:10.1083/jcb.201205090 (2012).
- 485 49 Li, J. *et al.* MYPT1 sustains centromeric cohesion and the spindle-assembly  
486 checkpoint. *J Genet Genomics* **40**, 575-578, doi:10.1016/j.jgg.2013.08.005  
487 (2013).
- 488 50 Li, J. *et al.* Phosphorylation of Ataxin-10 by polo-like kinase 1 is required for  
489 cytokinesis. *Cell Cycle* **10**, 2946-2958, doi:15922 [pii] (2011).

490

491

492 **Figure Legends**

493 **Figure 1. Elevated O-GlcNAc levels leads to aberrant centrosome separation via**

494 **PLK1.** (A) HeLa cells were treated with TMG, BI2536 or TMG + BI2536, then

495 stained with anti- $\gamma$ -tubulin antibodies and DAPI. Scale bar, 10  $\mu$ M. (B) Quantitation

496 of inter-centrosomal distances in (A). More than 25 cells were counted for each

497 experiment. The data represent mean  $\pm$  S. D. of three independent experiments.

498 Asterisks indicate significant difference as determined by t-test (p1-2=0.005,

499 p2-4=0.008). (C) Quantitation of percent of cells with separated centrosomes in (A).

500 Asterisks indicate significant difference as determined by t-test (p1-2=0.02,

501 p2-4=0.02)

502

503 **Figure 2. OGT interacts with the central region of MYPT1.** (A) Recombinant

504 GST-OGT proteins were incubated with HA-MYPT1-transfected cell lysates. (B)

505 His-OGT and GST-MYPT1 proteins were incubated together and then subject to

506 pulldown assays as indicated. (C) A diagram showing MYPT1 constructs used in this

507 study. Full-length (FL), F1(1-306), F2(297-600), F3(586-901) and F4(886-1030) were

508 previously described<sup>24</sup>. 4A denotes T577AS585AS589AS601A. (D) Recombinant

509 GST-MYPT1-FL, F1, F2, F3 and F4 proteins were purified from bacteria, and

510 incubated with extracts from 293T cells transfected with Myc-OGT. Asterisks

511 demarcate corresponding proteins.

512

513 **Figure 3. MYPT1 is O-GlcNAcylated at T577, S585, S589 and S601. (A-D)**

514 Electron Transfer Dissociation (ETD) mass spectrometry combined with  
515 chemo-enzymatic labeling identified that T577S585 S589S601 are O-GlcNAcylated  
516 <sup>33</sup>.

517

518 **Figure 4. O-GlcNAcylation of MYPT1 antagonizes CDK1-dependent**

519 **phosphorylation at S473.** (A) MYPT1-WT and 4A plasmids together with  
520 Myc-OGT or empty vectors were transfected into 293T cells and then blotted with  
521 antibodies indicated. (B) Cells were transfected with HA-MYPT1-WT or 4A plasmids,  
522 and then the lysates were IBed with antibodies indicated. (C) Cells were treated with  
523 Noc, or Noc with Ro-3306 for the time indicated. (D) HeLa cells were transfected  
524 with HA-MYPT1, treated or untreated with 5S-G (OGT inhibitor). (E) Cells were  
525 treated with Noc, or Noc + 5S-G. (F) Cells were transfected with MYPT1-WT  
526 plasmids, and then treated with Noc, or Noc plus TMG + Glu as indicated.

527

528 **Figure 5. O-GlcNAcylation of MYPT1 attenuates the interaction between**

529 **MYPT1 and PLK1.** (A) 293T cells were transfected with Flag-PLK1 and  
530 HA-MYPT1, treated or not treated with Noc, TMG + Glu, respectively, then subject  
531 to IP and IB as indicated. (B) GST-PLK1-PBD proteins were purified from bacteria.  
532 Cells were transfected with HA-MYPT1-WT or 4A, then the cell lysates were subject  
533 to GST-PLK1-PBD pulldown assays. (C) Cells were transfected with FLAG-PLK1

534 together with HA-MYPT1-WT or 4A, then subject to IP and IB as indicated. (D)

535 Cells were transfected with HA-MYPT1-WT or 4A, and then cell extracts were

536 utilized in His-PLK1 pulldown assays.

537

538 **Figure 6. O-GlcNAcylation of MYPT1 promotes PLK1 activity.** (A)

539 IP-phosphatase assays. U2OS cells were transfected with Flag-MYPT1, synchronized

540 to mitosis with Noc, then treated with TMG + Glu or left untreated. The anti-Flag

541 immunoprecipitates were then incubated with recombinant His-PLK1. (B)

542 IP-phosphatase assays using the MYPT1-WT and -4A mutants without Noc

543 treatment.

544

545 **Figure 7. MYPT1 overproduction overrides the centrosome disjunction defects**

546 **induced by TMG** (A) Lenti viruses encoding vectors or sh*MYPT1* was introduced

547 into HeLa cells, together with HA-MYPT1-WT or -4A plasmids. The cellular lysates

548 were IBed with the antibodies indicated. (B) Cells in (A) were subject to indirect IF

549 using the antibodies indicated. (C) Quantitation of percent of cells with separated

550 centrosomes in (B). Asterisks indicate significant difference as determined by t-test

551 ( $p_{1-2}=0.0002$ ,  $p_{2-3}=0.22$ ,  $p_{2-4}=0.001$ ). (D) We propose that MYPT1 is

552 O-GlcNAcyated at T577 S585 S589 S601, which antagonizes CDK1-dependent

553 phosphorylation at S473 and MYPT1-PLK1 interaction. By disjoining PLK1 from the



554 MYPT1/PP1c $\beta$  complex, PLK1 activity is elevated, thus promoting centrosome

555 separation.

A

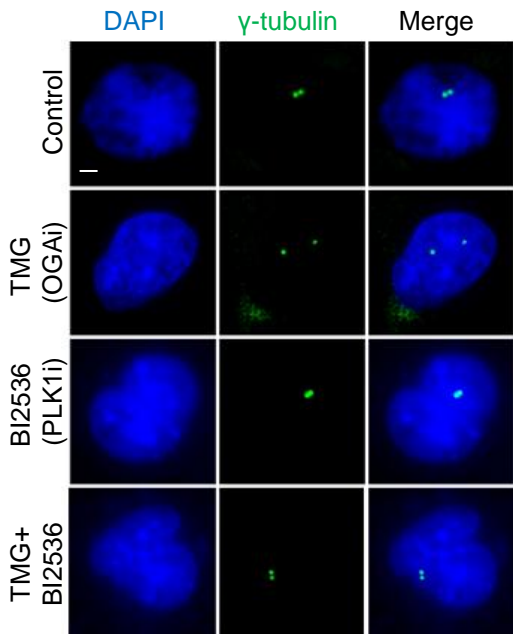

B

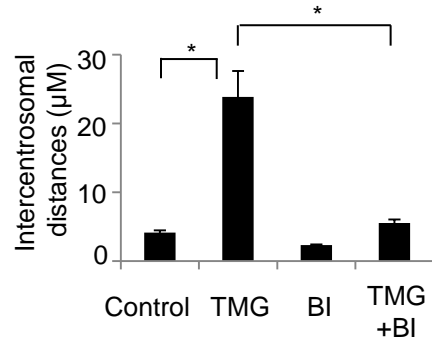

C

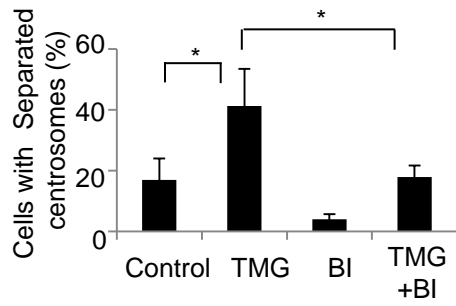

Figure 1

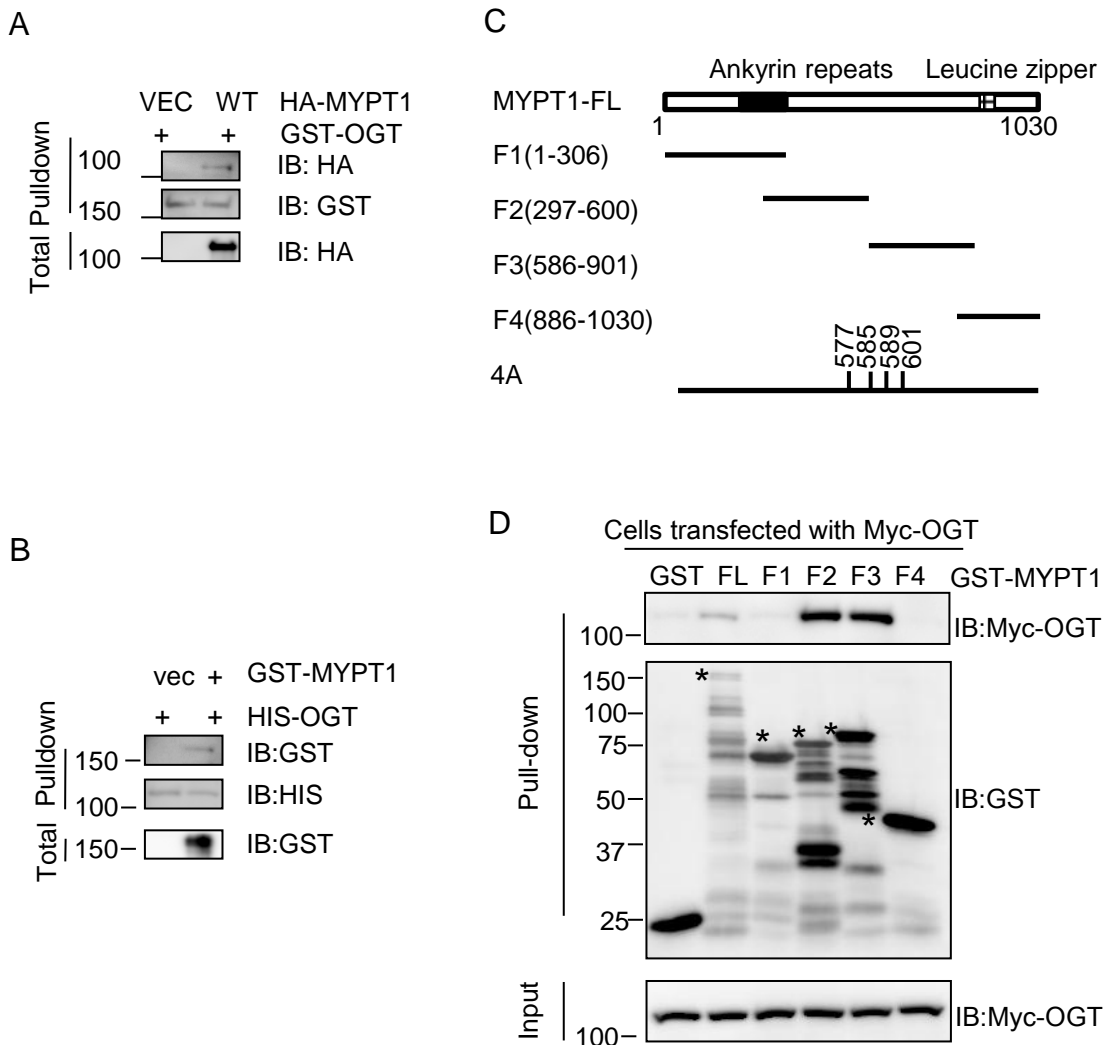

Figure 2

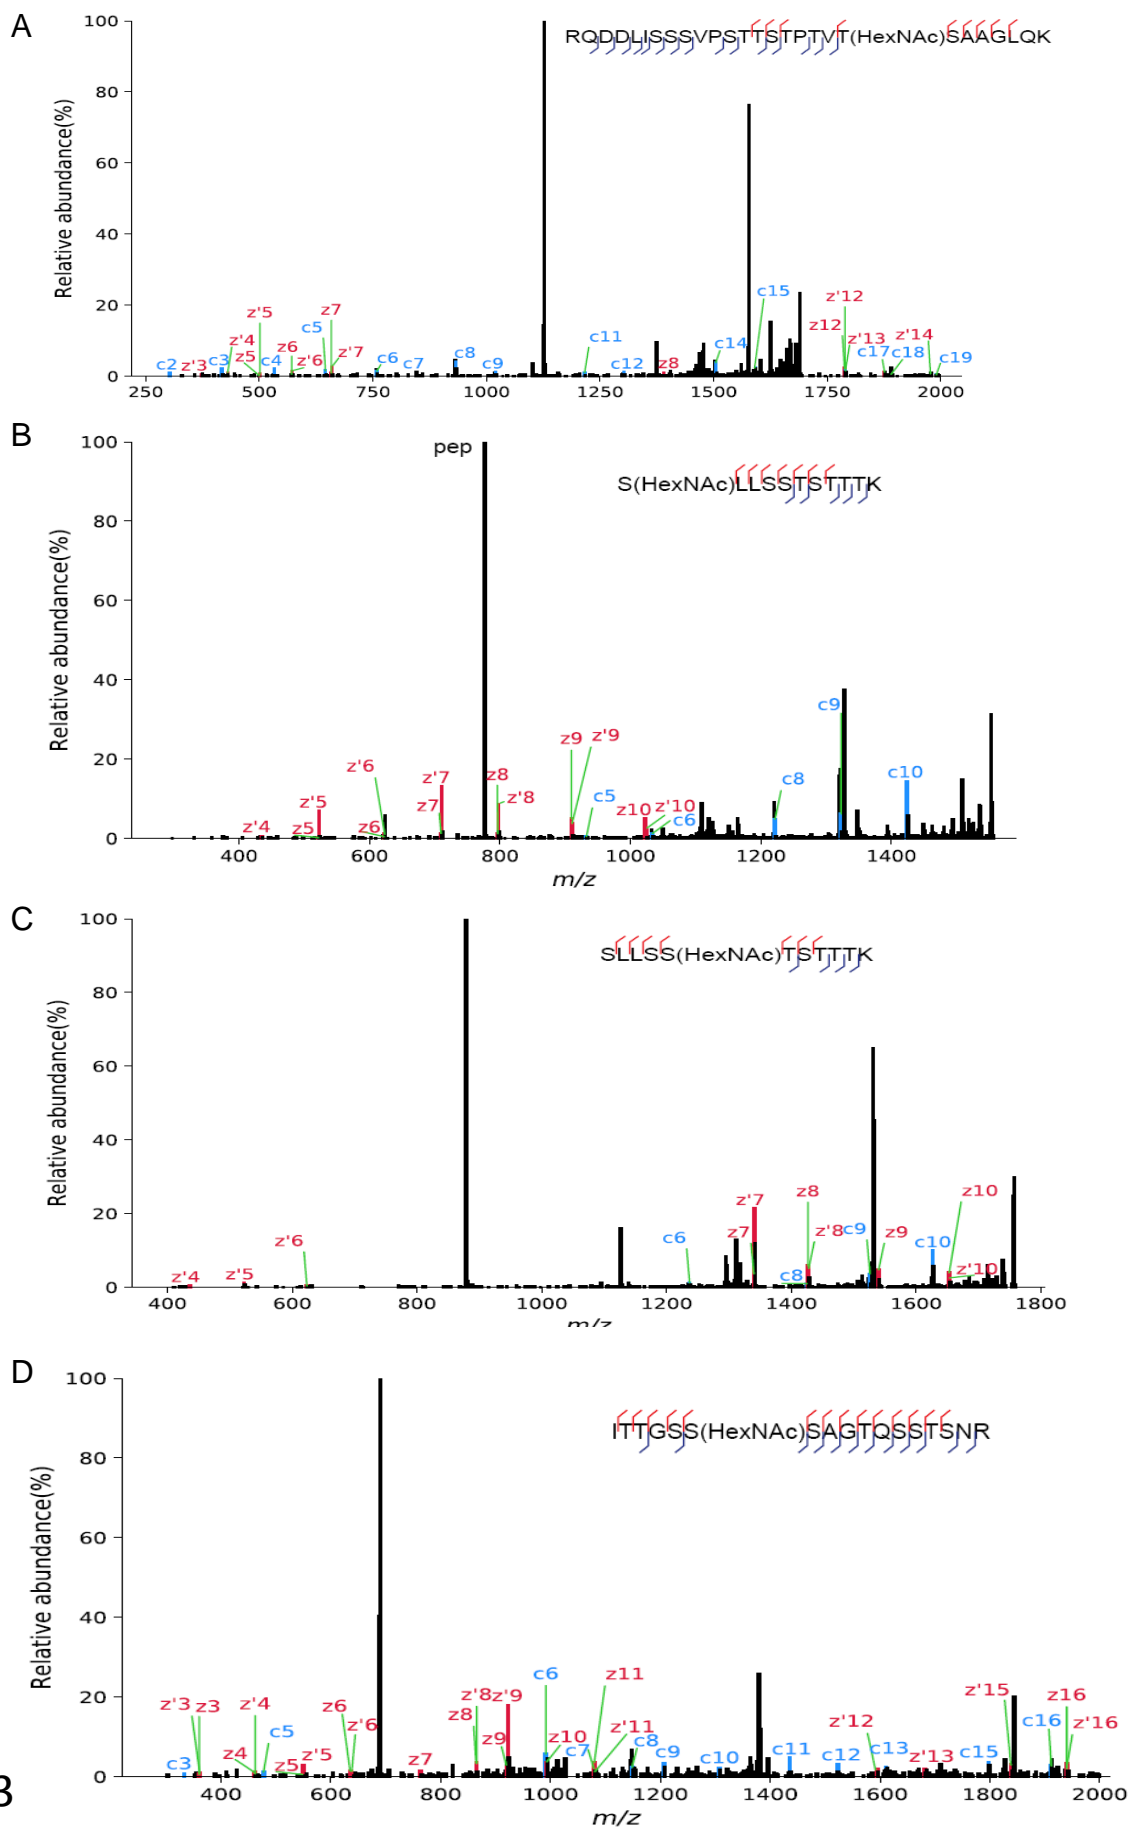

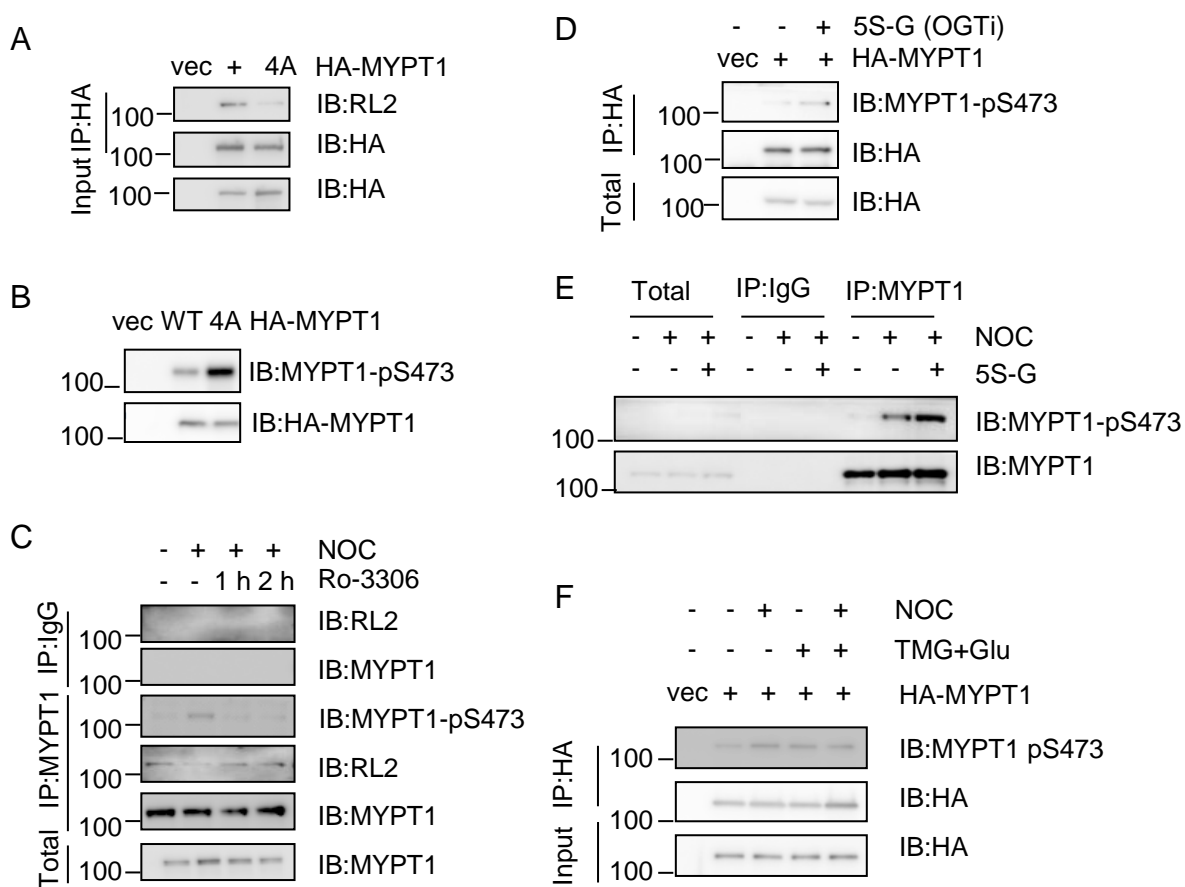

Figure 4

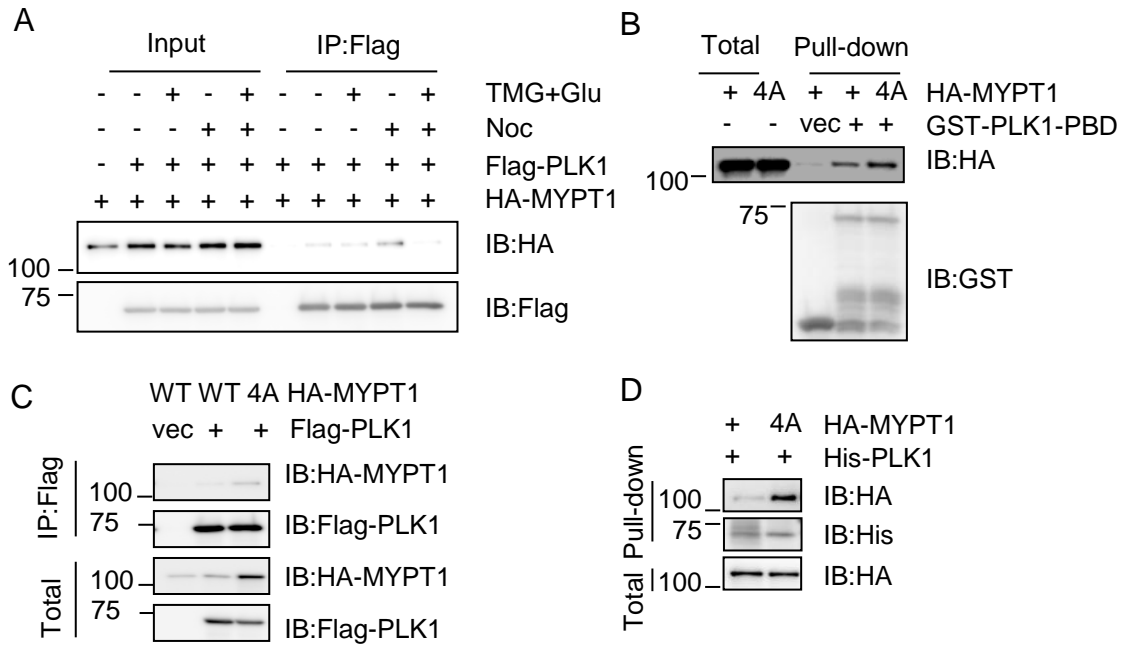

Figure 5

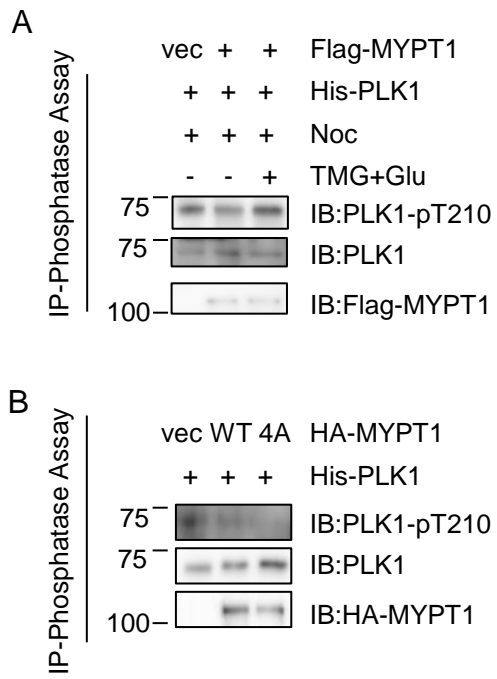

Figure 6

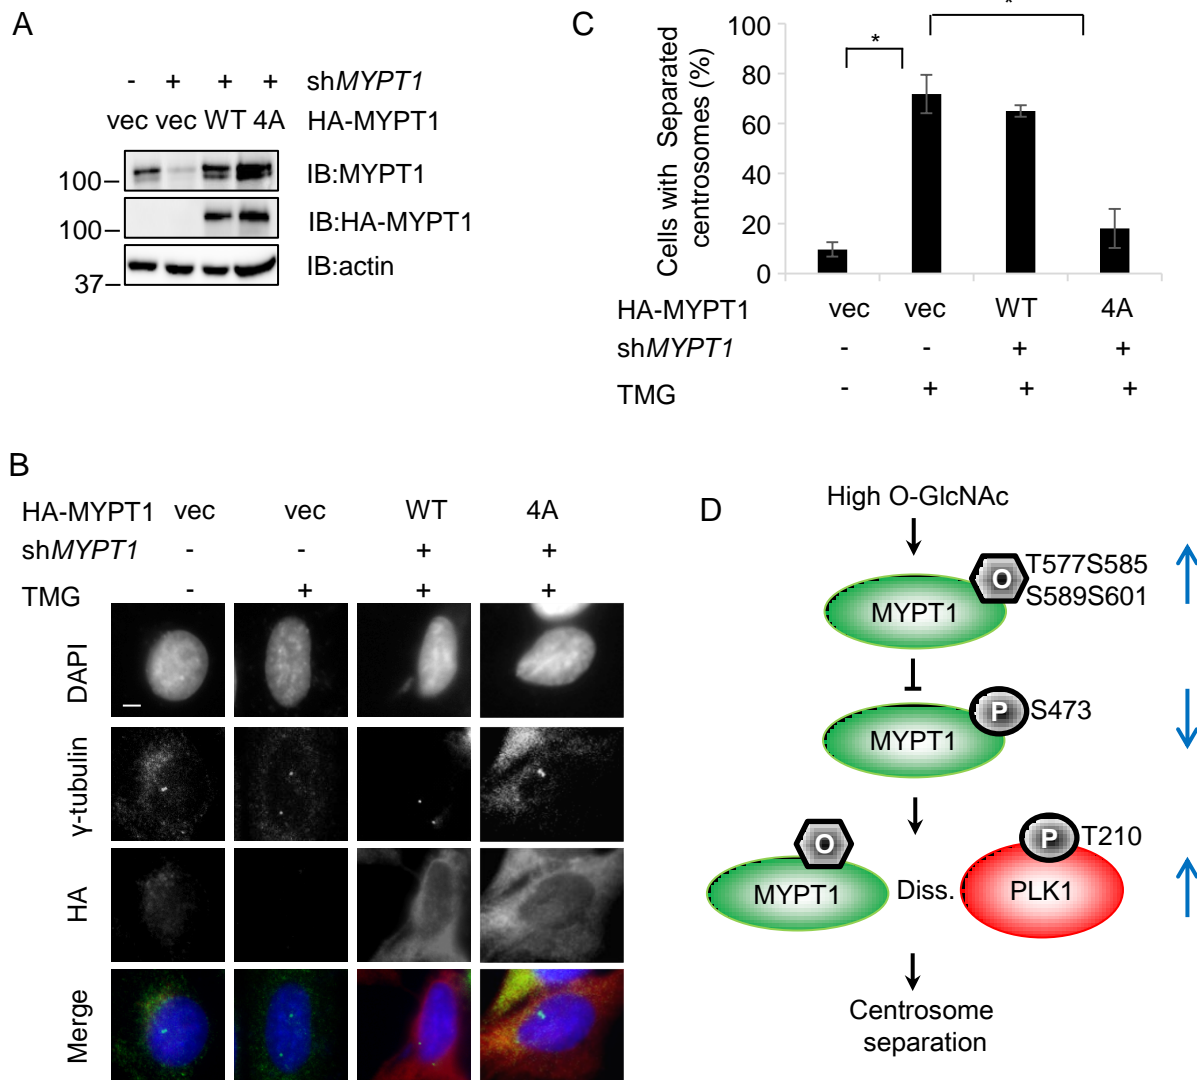

Figure 7
